# Supplementary material
Source: MDPI journal article supplement (https://www.mdpi.com/2571-6131/6/3/91)
Supplement: s1 [file s1]

Archive with 1 entries (1 files):
- ceramics-2454379-supplementary.pdf
